# Supplementary material for: Cationic Lignocellulose Nanofibers from Agricultural Waste as High-Performing Adsorbents for the Removal of Dissolved and Colloidal Substances
Source: MDPI journal article supplement (doi:10.3390/polym14050910), 2022-02-24
Supplement: s1 [file s1]

## Supplementary Materials

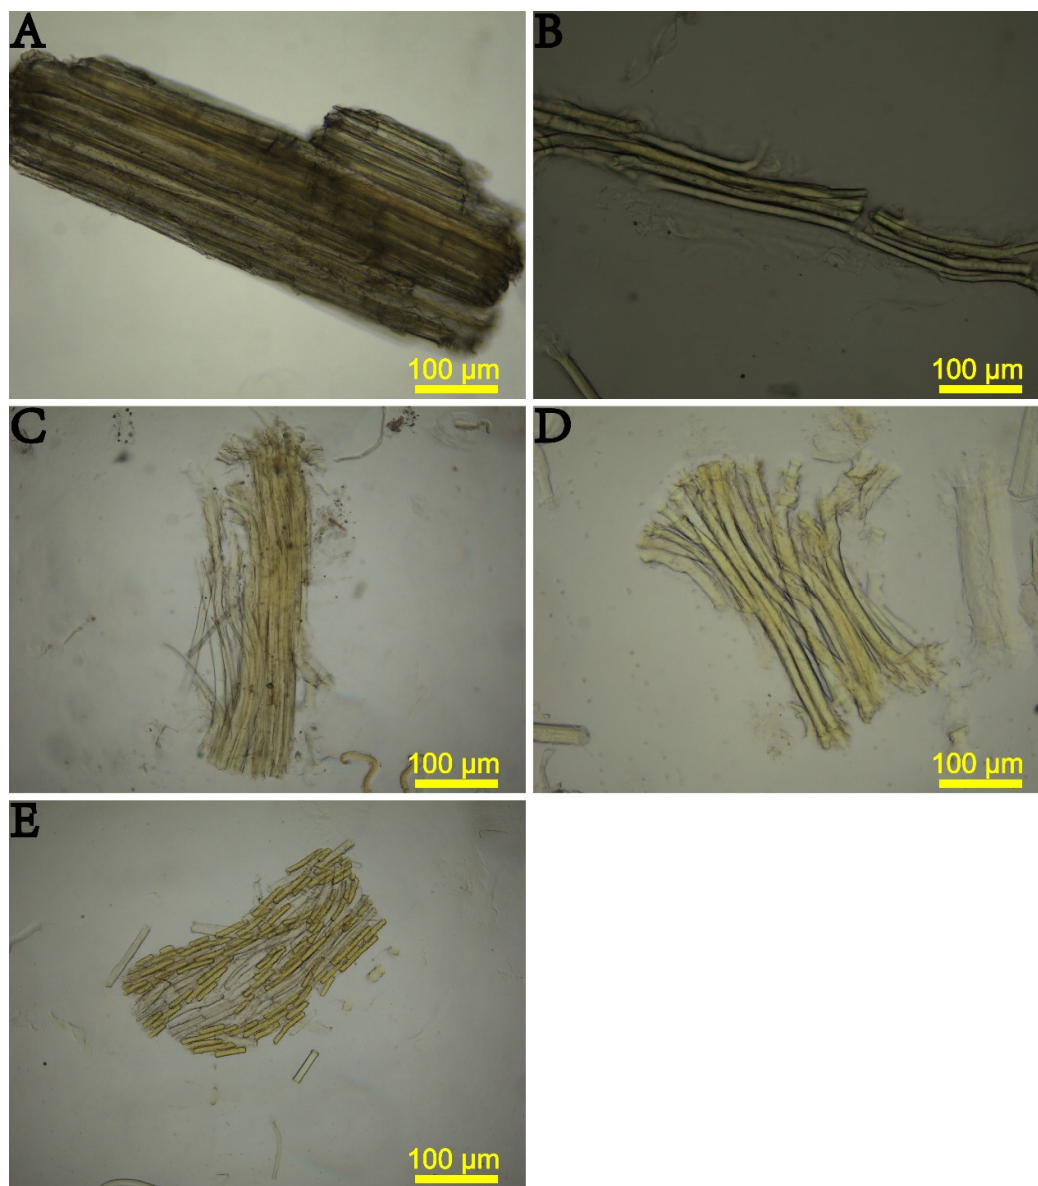

**Figure S1.** Optical microscope images of bagasse (A), the precursors of LCNF, CLCNF-1, CLCNF-2, and CLCNF-3 (B-E).

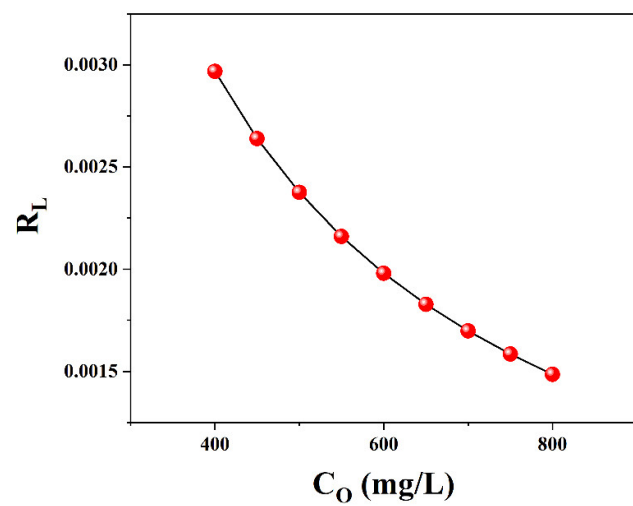

**Figure S2.** Separation factor of PGA adsorption by CLCNF-3.
